# Supplementary material for: In Silico Screening of Circulating MicroRNAs as Potential Biomarkers for the Diagnosis of Ovarian Cancer
Source: PubMed Central journal article supplement (PMC6701281; doi:10.1155/2019/7541857), 2019-08-04

## Supplementary Materials

Figure S1: The relative expression levels of 5 identified miRNAs in serum samples from patients with different types of tumors and healthy women. (a) miR-200a-5p, (b) miR-200b-3p, (c) miR-200c-3p, (d) miR-429, (e) miR-25-3p.

**Figure S1**

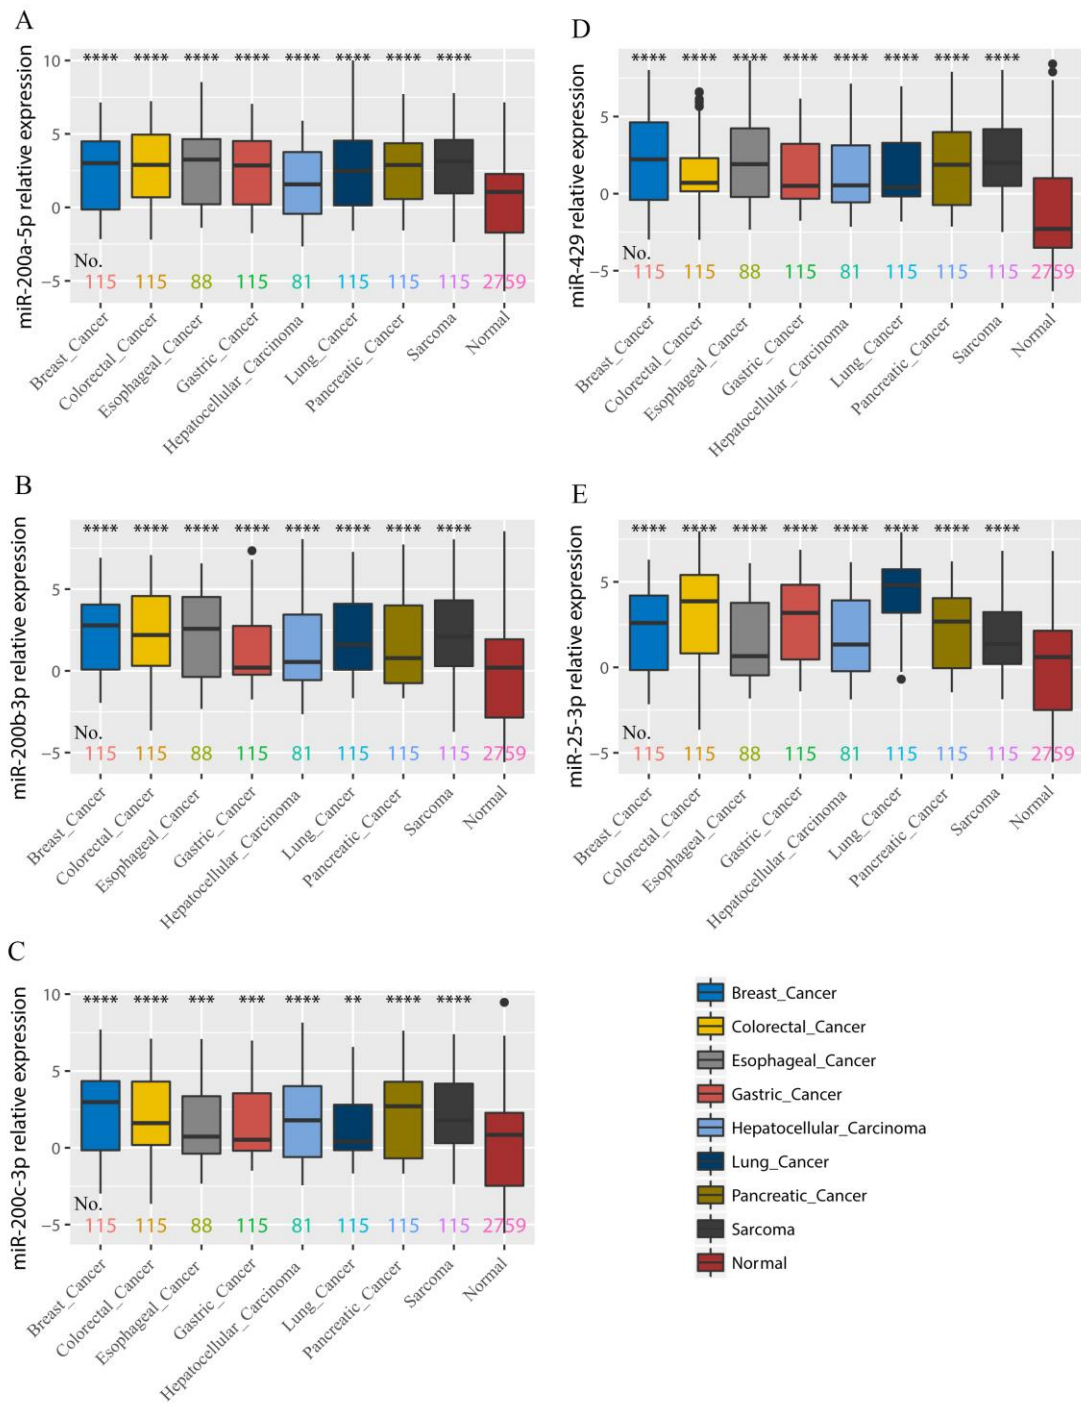

Supplement: 7541857.f1.pdf [file 7541857.f1.pdf]
